# Supplementary material for: A Prediction Model for Sight-Threatening Diabetic Retinopathy Based on Plasma Adipokines among Patients with Mild Diabetic Retinopathy
Source: Hindawi journal article supplement (doi:10.1155/2023/8831609), 2023-10-25

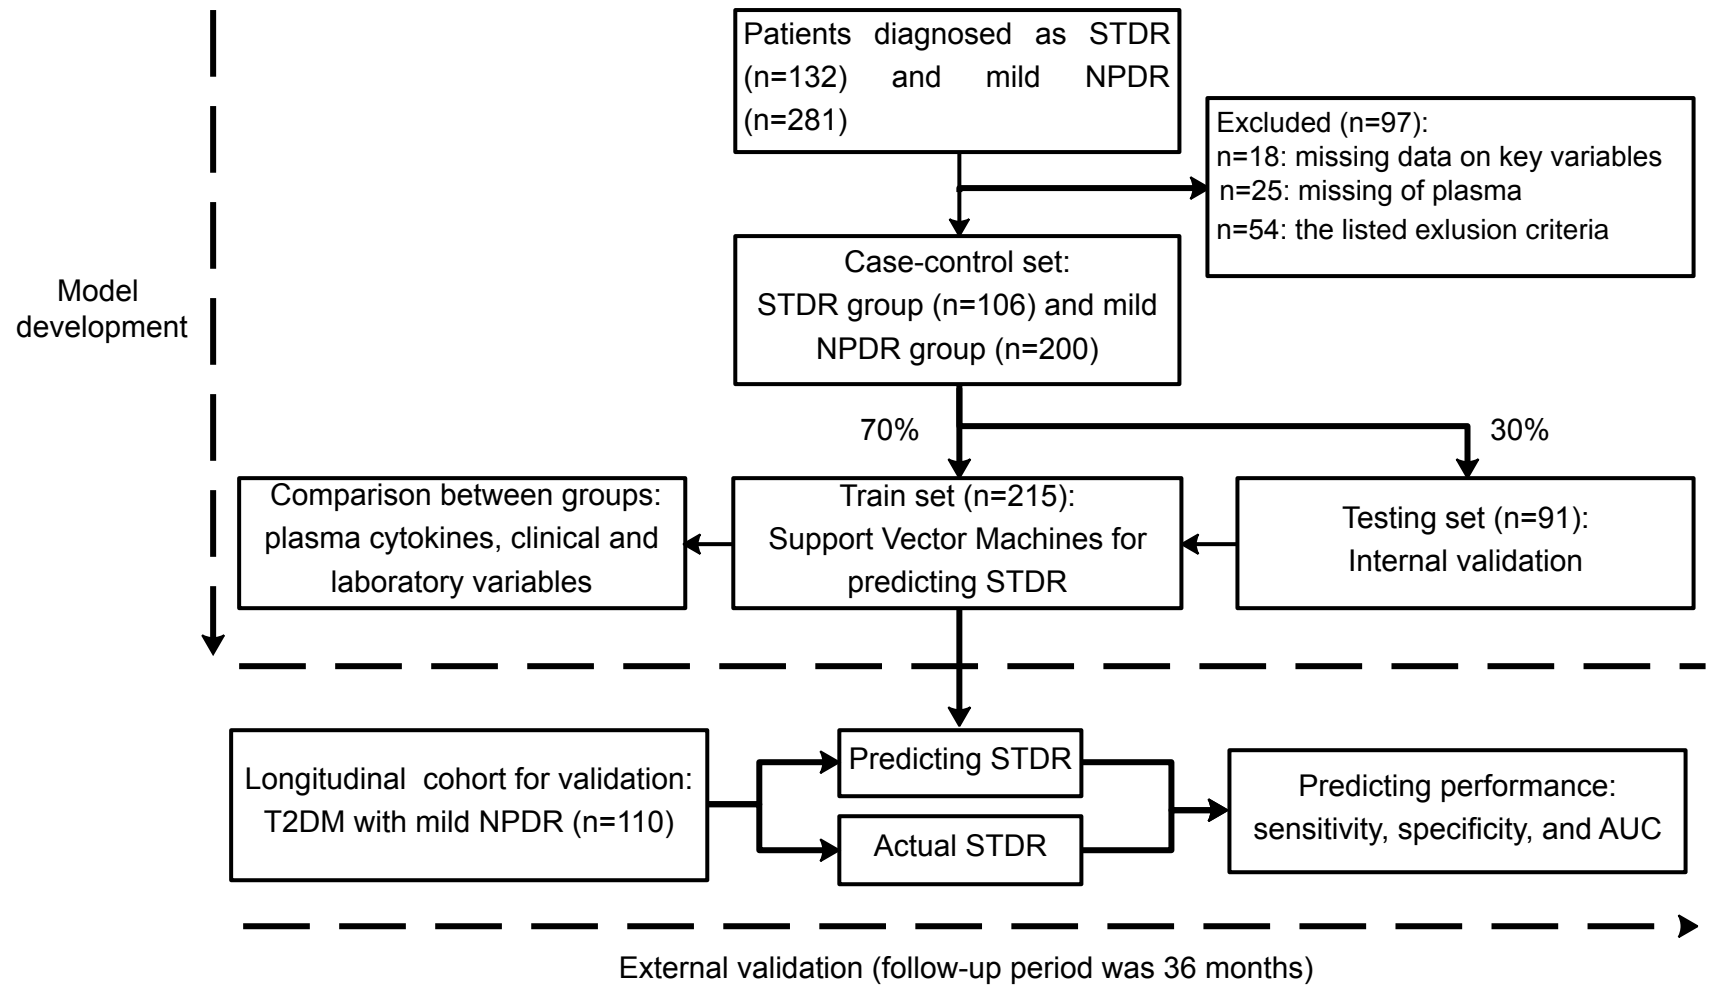

Supplement: f1 [file 8831609.f1.pdf]
